# Supplementary material
Source: PubMed Central journal article supplement (PMC5705236)
Supplement: NIHMS920775-supplement-supplement_1.pdf [file NIHMS920775-supplement-supplement_1.pdf]

**SUPPLEMENTARY ONLINE DATA**

**HEXIM1 plays a critical role in the inhibition of the androgen receptor by anti-androgens**

I-Ju YEH\*, Kyung SONG†<sup>1</sup>, Bryan M. WITTMANN\*<sup>2</sup>, Xiaodong BAI‡, David DANIELPOUR†<sup>3</sup> and Monica M. MONTANO\*<sup>3</sup>

\*Department of Pharmacology, Case Western Reserve University, Cleveland, OH 44106, U.S.A.

†Division of General Medical Science – Oncology, Case Comprehensive Cancer Center, Case Western Reserve University, Cleveland, OH 44106, U.S.A.

‡Center for RNA Biology, Case Western Reserve University, Cleveland, OH 44106, U.S.A.

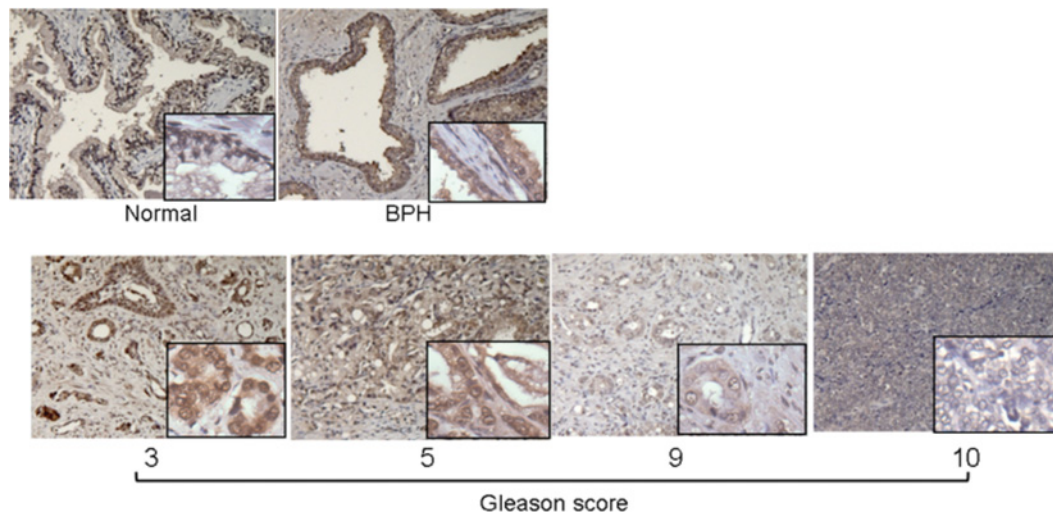

**Figure S1 Expression levels of HEXIM1 in normal prostate and prostate cancer tissue**

Sections obtained from normal prostate tissues, BPH tissues and prostate tumour were stained for endogenous HEXIM1.

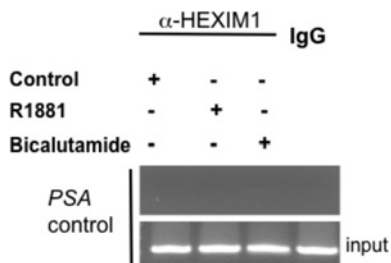

**Figure S2 HEXIM1 was not recruited to the control PSA region**

LNCaP cells stably transfected with control or HEXIM1miR were treated with vehicle, 10 nm R1881 or 10  $\mu$ M bicalutamide. Shown are ChIP analyses of lysates immunoprecipitated with antibodies against HEXIM1 or control non-specific rabbit immunoglobulin, followed by PCR amplification of the non-ARE-containing region of PSA. The image is representative of three independent experiments.

Received 13 March 2014/1 May 2014; accepted 20 May 2014  
 Published as BJ Immediate Publication 20 May 2014, doi:10.1042/BJ20140174

<sup>1</sup> Present address: College of Pharmacy, Wonkwang University, Iksan City, Cheonbuk 570-749, Republic of Korea.  
<sup>2</sup> Present address: Metabolon Inc., Durham, NC 27713, U.S.A.  
<sup>3</sup> Correspondence may be addressed to either of these authors (email dxd49@case.edu or mxm126@case.edu).
